# Supplementary material for: Identification of Functional Mutations in GATA4 in Patients with Congenital Heart Disease
Source: PubMed Central journal article supplement (PMC3633926; doi:10.1371/journal.pone.0062138), 2013-04-23
Supplement: pone.0062138.s001.pdf [file pone.0062138.s001.pdf]

# ConSurf Results

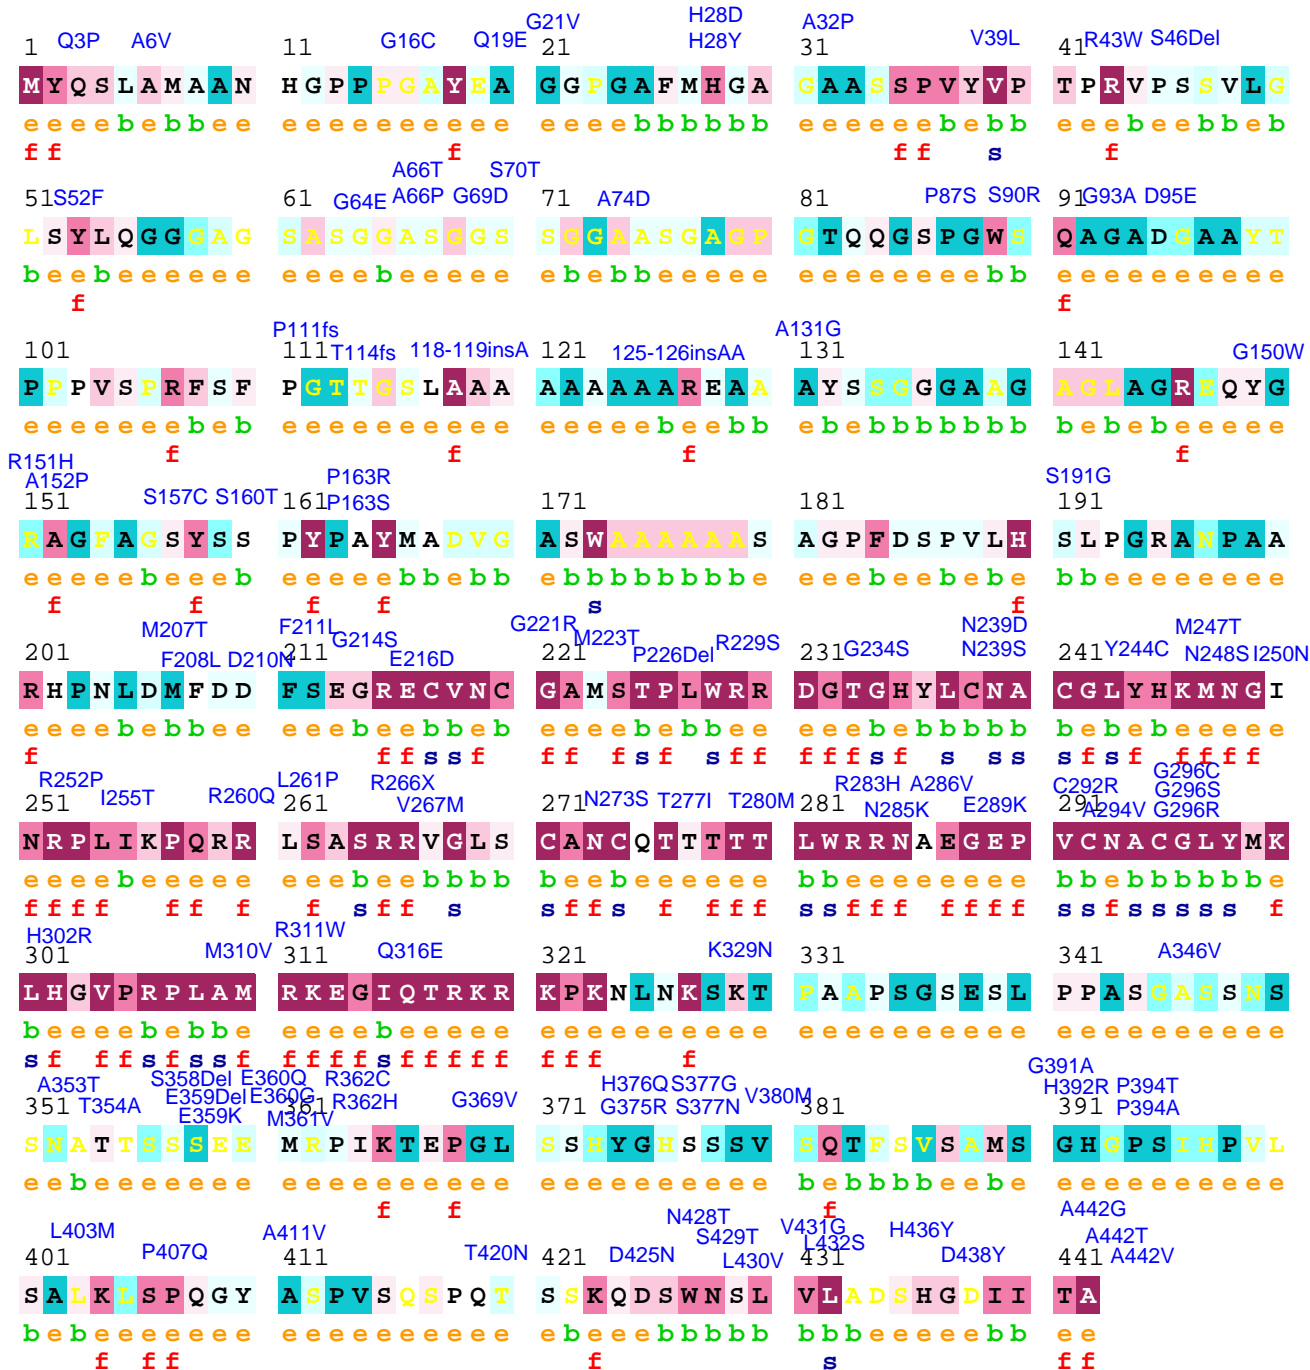

## The conservation scale:

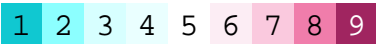

Variable      Average      Conserved

- e** - An exposed residue according to the neural-network algorithm.
- b** - A buried residue according to the neural-network algorithm.
- f** - A predicted functional residue (highly conserved and exposed).
- s** - A predicted structural residue (highly conserved and buried).
- x** - Insufficient data - the calculation for this site was performed on less than 10% of the sequences.
