# Supplementary material for: Identification of Functional Mutations in GATA4 in Patients with Congenital Heart Disease
Source: PubMed Central journal article supplement (PMC3633926; doi:10.1371/journal.pone.0062138), 2013-04-23
Supplement: pone.0062138.s002.pdf [file pone.0062138.s002.pdf]

# CLUSTAL 2.1 MULTIPLE SEQUENCE ALIGNMENT

File: D:/New\_LifeScience/collaborations/WangHongyan/GATA1 to GATA6/GATA345 Date: Fri Mar 23 22:31:26 2012  
 Page 1 of 3

GATA-4 Human  
 ENSPTRG00000019993 Chimpanzee  
 ENSBTAG00000005425 Cow  
 ENSRNOG00000010708 Rat  
 ENSMUSG00000021944 Mouse  
 ENSGALG00000016662 Chicken  
 ENSXETG0000000673 Frog  
 ENSTRUG00000012112 J Puffer  
 ENSTNIG00000016369 T Puffer  
 ENSDARG00000035759 Zebrafish  
 GATA-5 Human  
 ENSPTRG00000013711 Chimpanzee  
 ENSCAF00000012709 Dog  
 ENSMUSG00000015627 Mouse  
 ENSRNOG00000036732 Rat  
 ENSGALG00000005352 Chicken  
 ENSTNIG00000002769 T Puffer  
 ENSDARG00000017821 Zebrafish  
 GATA-6 Human  
 ENSBTAG00000005734 Cow  
 ENSMUSG00000005836 Mouse  
 ENSRNOG00000023433 Rat  
 ENSTRUG00000012674 J Puffer  
 ENSTNIG00000014837 T Puffer  
 ENSDARG00000035831 Zebrafish  
 ENSXETG00000003144 Frog  
 FBgn0003117\_Fly

```

-----
---MALT DGGWCLPKRFGAAG-ADASD-SRAFPAREPSTPPPISSSSSS--CSRGGERGPGGASNCITPOLDTEAAGPPARSLLLSSYASHPFPGAPHGFSAPGVAGPGGNLSSWEDLLLFIDLDCAATASKLLWSSR--GAKLSP 138
---MALTDGGWCLPKRLGAAPPADASD-SGAFPAREPSTPPPISSSSSSC--CSRGGERGPGGASNCITPOLDTEAAGPPARSLLLSSYASHPFPGAPHGFSAPGISGPGALSSWEDLLLFADLDCAATASKLLWSSR--GAKLSP 140
---MALTDGGWCLPKRFGAAA-ADAGD-SGFPFAPREPSSPLPISSSSSS--CSRGGDRGPCGASNCITPOLDTEAVAGPPGRSLLLSPYASHPFAAAHGAAPGVAGPGSALSTWEDLLLFIDLDCAATASKLLWSSR--GAKLSP 138
---MALTDGGWCLPKRFGAAS-ADAGD-SGFPFAPREPSSPLPISSSSSS--CSRGGDRGPCGASNCITPOLDTEAVAGPPGRSLLLSPYASHPFAAAHGAAPGVAGPGSALSTWEDLLLFIDLDCAATASKLLWSSR--GAKLSP 138
---LLPTLTKGKCSWMDLGENSWSMVKREVS--PGSPAEQI--VLPGDSRRDGPISDDLRTF-PSLDLALGHRPDPGRSLHSYVHFCHHN-----NTLTTVEDIPLFTDLDGOG--KLVLPGG--AHKAG 115
-----SWMDLGENSWSMVKREVS--PGSPAEQI--VLPGDSRRDGPISDDLRTF-PSLDLALGHRPDPGRSLHSYVHFCHHN-----NTLTTVEDIPLFTDLDGOG--KLVLPGG--AHKAG 105
---MDLGDNSWSMVKREVS--PGSPAEQI--VLTNDRR--DRLRSAPATHLDPVGSRRRABGRPLHSYVHFCHPN-----NALPSSDDVTLFTDLDGOGN--KLIISGGHPRETHKGG 104
MSWERHPOESRLRIPISORPHITWMDLNEDVSGGTRLSANSPFPCPIKQSPGTPPPSPFCQLGSS--ECLRLPDRGPHITIS--AEGRPAPPEYHPLG-----LSHPEDLILFRDLHDIN--KLIVPNR--ETRYSS 125
-----
1.....10.....20.....30.....40.....50.....60.....70.....80.....90.....100.....110.....120.....130.....140.....150
    
```

GATA-4 Human  
 ENSPTRG00000019993 Chimpanzee  
 ENSBTAG00000005425 Cow  
 ENSRNOG00000010708 Rat  
 ENSMUSG00000021944 Mouse  
 ENSGALG00000016662 Chicken  
 ENSXETG0000000673 Frog  
 ENSTRUG00000012112 J Puffer  
 ENSTNIG00000016369 T Puffer  
 ENSDARG00000035759 Zebrafish  
 GATA-5 Human  
 ENSPTRG00000013711 Chimpanzee  
 ENSCAF00000012709 Dog  
 ENSMUSG00000015627 Mouse  
 ENSRNOG00000036732 Rat  
 ENSGALG00000005352 Chicken  
 ENSTNIG00000002769 T Puffer  
 ENSDARG00000017821 Zebrafish  
 GATA-6 Human  
 ENSBTAG00000005734 Cow  
 ENSMUSG00000005836 Mouse  
 ENSRNOG00000023433 Rat  
 ENSTRUG00000012674 J Puffer  
 ENSTNIG00000014837 T Puffer  
 ENSDARG00000035831 Zebrafish  
 ENSXETG00000003144 Frog  
 FBgn0003117\_Fly

```

-----
---MYQSLAMAANHGPPPGAYEAGGPGAFMHGAGA---ASSPVYVTPTR-VPSVVLGLSY-LOGGGAGSAGGGASGGSSGGAASGAGPGTIQGGSPGWSQA-GADGAAYTP-----PPVSP----- 106
---MYQSLAMAANHGPPPGAYEAGGPGAFMHGAGA---ASSPVYVTPTR-VPFVVLGLSY-LOGGGAGSAGGGASGGSSGGAASGAGPGTIQGGSPGWSQA-GADGAAYTP-----PPVSP----- 106
---MYQSLAMAANHGPPPGAYEAGGPGAFMHGAGA---ASSPVYVTPTR-VPSVVLGLSY-LOGGGGGAASGAASGGSSGAAPSGAGPGTIQGGSPGWSQA-GAEGAAYTP-----PPVSP----- 106
---MYQSLAMAANHGPPPGAYEAGGPGAFMHGAGA---ASSPVYVTPTR-VPSVVLGLSY-LOGGGGAAAGATSGGSSGAGPSGAGPGTIQGGSPGWSQA-GAEGAAYTP-----PPVSP----- 106
---MYQSLAMAANHGPP--SYEGAG--GFMHGAAA---AS-PVYVTPTR-VPSMLPISLPI-LPSSGSSQQASPVSSHS-----IWTQP-GAESAAANPG-----SS-HPPVSP----- 88
---MYQSIAMAANHGPP--AYEGAG--GYMHSATA---ATSPVYVTPTR-VSMIPISLPI-LPSSGSSQQASPVSSHS-----MWAQA-GAEPANPG-----SS-HPPVSP----- 89
---MYQGI-MSNHGGPP--SYEAG--FLHNTSA---ATSPVYVTPTRVVTMPALPI-LQTFGASQQSSPVSSHS-----AWAQP-GSDSVSNYS-----HSPVSP----- 84
---MYQGI-MSSHGPP--SYEAG--FLHNTSA---ATSPVYVTPTRVVTMPALPI-LQTFGASQQSSPVSSHS-----AWAQP-GSEPVSNYS-----HSPVSP----- 84
---MYQGVMAANHGAA--SYEG--FLHNS---TSPVYVTPTR-VTPMLQALPI-LQAP--QQSSPASGHS-----GWAQP-GVETISVNS--FGHHSFVS----- 82
---MYQSLALAASPRQAAY--ADSGS--FLHAPG---AGSPMFVPPAR-VP--SMLS-LSGCEPSPQPELA-----ARPGWAQTATADSAFG-----PGSPHPAAHPPGA 90
---MYQSLALAASPRQAAY--ADSGS--FLHAPG---AGSPMFVPPAR-VP--SMLS-LSGCEPSPQPELA-----ARPGWAQTATADSAFG-----PGSPHPAAHPPGA 90
---MYPSLALAPSPGQAAY--TDSGA--FLPAPA---AGSPVFPVPPAR-VP--PMLPI-LPCEPSPQAPGRG-----AHPGWAQ--AADSAFG-----PGSPHPAAHPPGA 88
---MYQSLALAASPRQAAY--ADSGA--FLHSSG---AGSPVFPVPPAR-VP--SMLPI-LPCEPSPQAPALA-----AHSWTQVAADSAFG-----PGSPHPAAHPPGA 90
---MYQSLALAASPRQAAY--ADSGA--FLHSSG---AGSPVFPVPPAR-VP--SMLPI-LPCEPSPQAPALA-----AHSWTQVAADSAFG-----PGSPHPAAHPPGA 90
---MYQGLALAFNHGQASVHSDSGN--FLHSS---AGSPVYVTPTR-VPSVLQTLPI-LQSCPEP-HQSHLG-----HPPGWAQS-SGETAFN-----AGSPHPSPG 85
---MYQSLALSFN--QPPPHDTGT--YLHPP---ASSPVYVTPSR-VPAVLPTLPI-LQCEAPPQSHGLGGHHGLGGHHC-----LGGHHGPPFA-SADGPPFP-----FSSPLPHG 97
---MYSLALSFN--PSPVHSDSGN--YIHPS---ASSPVYVTPTR-VPAMLQTLPI-LQTCESSHQAHTIS-----SHHAWPQT-GTDNSSFN-----PGSPHPPPG 85
FAAEQP-EMYQTLAALSSQGAAY-DGAPGG-FVHSAAAAAAAAAAASSPVYVTPTR-VGSMPLGPIVHLGSSGSGPANHAGG-----AGAHPGWQA-SADSPYGGGGAGGGGAGPGGAGSAAHVVSAR 262
FAAEQP-EMYQTLAALSSQGAAY-DGAPGG-FVHSAAAAAAAAAAASSPVYVTPTR-VGSMPLGPIVHLGSSGSGPANHAGG-----AGAHPGWQA-SADSPYGGGGAGGGGAGPGGAGSAAHVVSAR 262
FAAEQP-EMYQTLAALSSQGAAY-DGAPGG-FVHSAAAAAAAAAAASSPVYVTPTR-VGSMPLGPIVHLGSSGSGPANHAGG-----AGAHPGWQA-SADSPYGGGGAGGGGAGPGGAGSAAHVVSAR 260
FAAEQP-EMYQTLAALSSQGAAY-DGAPGG-FVHSAAAAAAAAAAASSPVYVTPTR-VGSMPLGPIVHLGSSGSGPANHAGG-----AGAHPGWQA-SADSPYGGGGAGGGGAGPGGAGSAAHVVSAR 258
LLVDP--TDMYQTLAIAAASQSGY-DSSGG--YMHNSN-----NSPVYVTPSR-VGSMIPISLPI-LQAGG-AQPNHA-----VSSHVWSQS-TTESPSVS 209
LLVDP--TDMYQTLAIAAASQSGY-DSSGG--YMHNSN-----NSPVYVTPSR-VGSMIPISLPI-LQAGG-AQPNHA-----VSSHVWSQS-TTESPSVS 209
LIVDP--TDMYQTLAIAAASQSGVNDTPSAG-YMHNSN-----TSPVYVTPSR-VGSMIPISLPI-LQAGG-AQPNHA-----VSSHVWSQS-TTESPSVS 198
ALPEPPAGDMYQTLTITAAQGLGV-DHSQGT-FMHSAA-----SSPVYVTPSR-VGSMIPISLPI-LQAGG-AQPNHA-----VSSHVWSQS-TTESPSVS 199
ALPEPPAGDMYQTLTITAAQGLGV-DHSQGT-FMHSAA-----SSPVYVTPSR-VGSMIPISLPI-LQAGG-AQPNHA-----VSSHVWSQS-TTESPSVS 219
MGILLSDDGDSIDQOSTRDYPHFSGDYQN--VLLAASASTASASATHVAAVKMYSSAVAAVYTLAAAG-----AASAGVGVGSG----- 82
-----
160.....170.....180.....190.....200.....210.....220.....230.....240.....250.....260.....270.....280.....290.....300
    
```

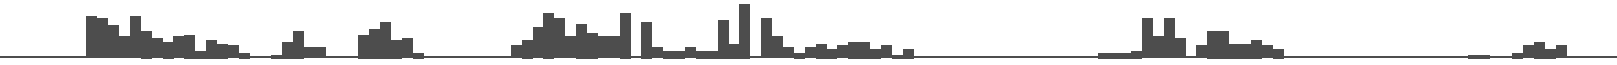

CLUSTAL 2.1 MULTIPLE SEQUENCE ALIGNMENT

File: D:/New\_LifeScience/collaborations/WangHongyan/GATA1 to GATA6/GATA345.Date: Fri Mar 23 22:31:26 2012

Table of multiple sequence alignment for GATA-4 across various species including Human, Chimpanzee, Cow, Rat, Mouse, Chicken, Frog, Puffer, and Zebrafish. It shows amino acid sequences with conserved regions highlighted and a scale at the bottom from 310 to 450.

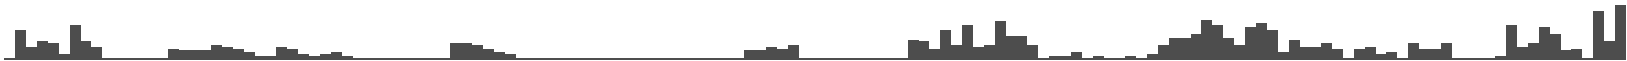

A second table of multiple sequence alignment, likely for GATA6, showing sequences for the same set of species as the first table. It includes a scale at the bottom from 460 to 600 and uses different highlighting to indicate conserved regions.

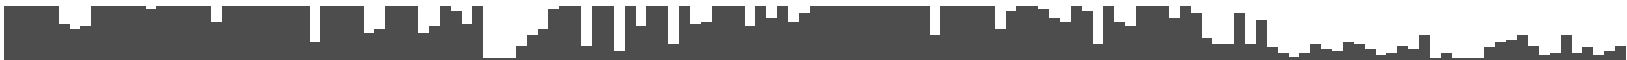

# CLUSTAL 2.1 MULTIPLE SEQUENCE ALIGNMENT

File: D:/New\_LifeScience/collaborations/WangHongyan/GATA1 to GATA6/GATA345 Date: Fri Mar 23 22:31:26 2012  
 Page 3 of 3

|                               |                                                                                          |     |
|-------------------------------|------------------------------------------------------------------------------------------|-----|
| GATA-4 Human                  | EMRPIKTEPGLSSHYGHSVSSVOT-FSVSAMSGHGPSIHPVLALKLSPQGYASPVVSQSPQSSKODSWNSLVLADSHGDIITA----- | 442 |
| ENSPTRG00000019993 Chimpanzee | EMRPIKTEPGLSSHYGHSVSSVOT-FSVSAMSGHGPSIHPVLALKLSPQGYASPVVSQSPQSSKODSWNSLVLADSHGDIITA----- | 399 |
| ENSBTAG00000005425 Cow        | EMRPIKTEPGLSSHYGHSVSSVOT-FSVSAMSGHGPSIHPVLALKLSPQGYASPVVSQSPQSSKODSWNSLVLADSHGDIITA----- | 442 |
| ENSRNOG00000010708 Rat        | EMRPIKTEPGLSSHYGHSVSSVOT-FSVSAMSGHGPSIHPVLALKLSPQGYASPVVSQSPQSSKODSWNSLVLADSHGDIITA----- | 441 |
| ENSMUSG00000021944 Mouse      | EMRPIKTEPGLSSHYGHSVSSVOT-FSVSAMSGHGPSIHPVLALKLSPQGYASPVVSQSPQSSKODSWNSLVLADSHGDIITA----- | 442 |
| ENSGALG00000016662 Chicken    | EMRPIKTEPGLSSHYGHSVSSVOT-FSVSAMSGHGPSIHPVLALKLSPQGYASPVVSQSPQSSKODSWNSLVLADSHGDIITA----- | 411 |
| ENSXETG00000000673 Frog       | EMRPIKTEPGLSSHYGHSVSSVOT-FSVSAMSGHGPSIHPVLALKLSPQGYASPVVSQSPQSSKODSWNSLVLADSHGDIITA----- | 394 |
| ENSTRUG00000012112 J Puffer   | EMRPIKTEPGLSSHYGHSVSSVOT-FSVSAMSGHGPSIHPVLALKLSPQGYASPVVSQSPQSSKODSWNSLVLADSHGDIITA----- | 386 |
| ENSTNIG00000016369 T Puffer   | EMRPIKTEPGLSSHYGHSVSSVOT-FSVSAMSGHGPSIHPVLALKLSPQGYASPVVSQSPQSSKODSWNSLVLADSHGDIITA----- | 386 |
| ENSDARG00000035759 Zebrafish  | EMRPIKTEPGLSSHYGHSVSSVOT-FSVSAMSGHGPSIHPVLALKLSPQGYASPVVSQSPQSSKODSWNSLVLADSHGDIITA----- | 352 |
| GATA-5 Human                  | SLASPVCPGPMMA--PQASGQEDDELAPCHLEFKFEPEDFAFPSTAPSPQAGL-----RGALRQEAWCALALA-----           | 397 |
| ENSPTRG00000013711 Chimpanzee | SLASPVCPGPMMA--PQASGQEDDELAPCHLEFKFEPEDFAFPSTAPSPQAGL-----RGALRQEAWCALALA-----           | 397 |
| ENSCAFG00000012709 Dog        | SLASPVCPGPMMA--PQASGQEDDELAPCHLEFKFEPEDFAFPSTAPSPQAGL-----RGALRQEAWCALALA-----           | 400 |
| ENSMUSG00000015627 Mouse      | SLASPVCPGPMMA--PQASGQEDDELAPCHLEFKFEPEDFAFPSTAPSPQAGL-----RGALRQEAWCALALA-----           | 404 |
| ENSRNOG00000036732 Rat        | SLASPVCPGPMMA--PQASGQEDDELAPCHLEFKFEPEDFAFPSTAPSPQAGL-----RGALRQEAWCALALA-----           | 404 |
| ENSGALG00000005352 Chicken    | SLASPVCPGPMMA--PQASGQEDDELAPCHLEFKFEPEDFAFPSTAPSPQAGL-----RGALRQEAWCALALA-----           | 391 |
| ENSTNIG00000002769 T Puffer   | SLASPVCPGPMMA--PQASGQEDDELAPCHLEFKFEPEDFAFPSTAPSPQAGL-----RGALRQEAWCALALA-----           | 392 |
| ENSDARG00000017821 Zebrafish  | SLASPVCPGPMMA--PQASGQEDDELAPCHLEFKFEPEDFAFPSTAPSPQAGL-----RGALRQEAWCALALA-----           | 383 |
| GATA-6 Human                  | NTSPPTQPTASGAGAPVMTGAGE-SINPENSELKYSQDGLYIGVSLSPAEEV-----TSSVRQDSWCALALA-----            | 595 |
| ENSBTAG00000005734 Cow        | NTSPPTQPTASGAGAPVMTGAGE-SINPENSELKYSQDGLYIGVSLSPAEEV-----TSSVRQDSWCALALA-----            | 499 |
| ENSMUSG00000005836 Mouse      | NTSPPTQPTASGAGAPVMTGAGE-SINPENSELKYSQDGLYIGVSLSPAEEV-----TSSVRQDSWCALALA-----            | 589 |
| ENSRNOG00000023433 Rat        | NTSPPTQPTASGAGAPVMTGAGE-SINPENSELKYSQDGLYIGVSLSPAEEV-----TSSVRQDSWCALALA-----            | 587 |
| ENSTRUG00000012674 J Puffer   | NTSPPTQPTASGAGAPVMTGAGE-SINPENSELKYSQDGLYIGVSLSPAEEV-----TSSVRQDSWCALALA-----            | 511 |
| ENSTNIG00000014837 T Puffer   | NTSPPTQPTASGAGAPVMTGAGE-SINPENSELKYSQDGLYIGVSLSPAEEV-----TSSVRQDSWCALALA-----            | 497 |
| ENSDARG00000035831 Zebrafish  | NTSPPTQPTASGAGAPVMTGAGE-SINPENSELKYSQDGLYIGVSLSPAEEV-----TSSVRQDSWCALALA-----            | 501 |
| ENSXETG00000003144 Frog       | NTSPPTQPTASGAGAPVMTGAGE-SINPENSELKYSQDGLYIGVSLSPAEEV-----TSSVRQDSWCALALA-----            | 524 |
| FBgn0003117_Fly               | NTSPPTQPTASGAGAPVMTGAGE-SINPENSELKYSQDGLYIGVSLSPAEEV-----TSSVRQDSWCALALA-----            | 467 |

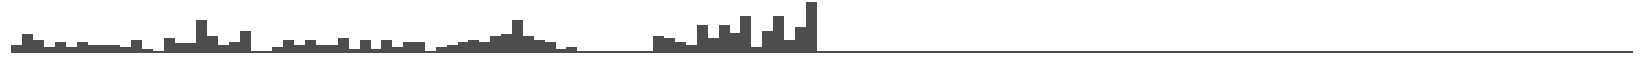

|                               |                                                                                                                          |     |
|-------------------------------|--------------------------------------------------------------------------------------------------------------------------|-----|
| GATA-4 Human                  | .....610.....620.....630.....640.....650.....660.....670.....680.....690.....700.....710.....720.....730.....740.....750 | 442 |
| ENSPTRG00000019993 Chimpanzee | .....610.....620.....630.....640.....650.....660.....670.....680.....690.....700.....710.....720.....730.....740.....750 | 399 |
| ENSBTAG00000005425 Cow        | .....610.....620.....630.....640.....650.....660.....670.....680.....690.....700.....710.....720.....730.....740.....750 | 442 |
| ENSRNOG00000010708 Rat        | .....610.....620.....630.....640.....650.....660.....670.....680.....690.....700.....710.....720.....730.....740.....750 | 441 |
| ENSMUSG00000021944 Mouse      | .....610.....620.....630.....640.....650.....660.....670.....680.....690.....700.....710.....720.....730.....740.....750 | 442 |
| ENSGALG00000016662 Chicken    | .....610.....620.....630.....640.....650.....660.....670.....680.....690.....700.....710.....720.....730.....740.....750 | 411 |
| ENSXETG00000000673 Frog       | .....610.....620.....630.....640.....650.....660.....670.....680.....690.....700.....710.....720.....730.....740.....750 | 394 |
| ENSTRUG00000012112 J Puffer   | .....610.....620.....630.....640.....650.....660.....670.....680.....690.....700.....710.....720.....730.....740.....750 | 386 |
| ENSTNIG00000016369 T Puffer   | .....610.....620.....630.....640.....650.....660.....670.....680.....690.....700.....710.....720.....730.....740.....750 | 386 |
| ENSDARG00000035759 Zebrafish  | .....610.....620.....630.....640.....650.....660.....670.....680.....690.....700.....710.....720.....730.....740.....750 | 352 |
| GATA-5 Human                  | .....610.....620.....630.....640.....650.....660.....670.....680.....690.....700.....710.....720.....730.....740.....750 | 397 |
| ENSPTRG00000013711 Chimpanzee | .....610.....620.....630.....640.....650.....660.....670.....680.....690.....700.....710.....720.....730.....740.....750 | 397 |
| ENSCAFG00000012709 Dog        | .....610.....620.....630.....640.....650.....660.....670.....680.....690.....700.....710.....720.....730.....740.....750 | 400 |
| ENSMUSG00000015627 Mouse      | .....610.....620.....630.....640.....650.....660.....670.....680.....690.....700.....710.....720.....730.....740.....750 | 404 |
| ENSRNOG00000036732 Rat        | .....610.....620.....630.....640.....650.....660.....670.....680.....690.....700.....710.....720.....730.....740.....750 | 404 |
| ENSGALG00000005352 Chicken    | .....610.....620.....630.....640.....650.....660.....670.....680.....690.....700.....710.....720.....730.....740.....750 | 391 |
| ENSTNIG00000002769 T Puffer   | .....610.....620.....630.....640.....650.....660.....670.....680.....690.....700.....710.....720.....730.....740.....750 | 392 |
| ENSDARG00000017821 Zebrafish  | .....610.....620.....630.....640.....650.....660.....670.....680.....690.....700.....710.....720.....730.....740.....750 | 383 |
| GATA-6 Human                  | .....610.....620.....630.....640.....650.....660.....670.....680.....690.....700.....710.....720.....730.....740.....750 | 595 |
| ENSBTAG00000005734 Cow        | .....610.....620.....630.....640.....650.....660.....670.....680.....690.....700.....710.....720.....730.....740.....750 | 499 |
| ENSMUSG00000005836 Mouse      | .....610.....620.....630.....640.....650.....660.....670.....680.....690.....700.....710.....720.....730.....740.....750 | 589 |
| ENSRNOG00000023433 Rat        | .....610.....620.....630.....640.....650.....660.....670.....680.....690.....700.....710.....720.....730.....740.....750 | 587 |
| ENSTRUG00000012674 J Puffer   | .....610.....620.....630.....640.....650.....660.....670.....680.....690.....700.....710.....720.....730.....740.....750 | 511 |
| ENSTNIG00000014837 T Puffer   | .....610.....620.....630.....640.....650.....660.....670.....680.....690.....700.....710.....720.....730.....740.....750 | 497 |
| ENSDARG00000035831 Zebrafish  | .....610.....620.....630.....640.....650.....660.....670.....680.....690.....700.....710.....720.....730.....740.....750 | 501 |
| ENSXETG00000003144 Frog       | .....610.....620.....630.....640.....650.....660.....670.....680.....690.....700.....710.....720.....730.....740.....750 | 524 |
| FBgn0003117_Fly               | .....610.....620.....630.....640.....650.....660.....670.....680.....690.....700.....710.....720.....730.....740.....750 | 540 |

HFHAAA...VAAVGVKTEASATNYDVNNCYFGGTFGALGGAATTTAMAGGAASELAGYHHCHNVIQAAKLMATSS  
 .....760.....770.....780.....790.....800.....810.....820...
